# Supplementary material for: Some Remarks on Colloid Stability: Selected Examples Taken from the Milk Chain for Food Prepares
Source: Preprints.org preprint supplement (doi:10.20944/preprints202009.0256.v1), 2020-09-11
Supplement: Supplementary file 1 [file supplementary]

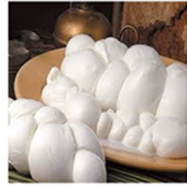

A

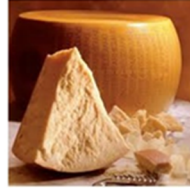

B

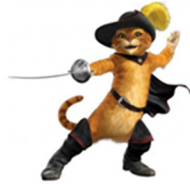

C

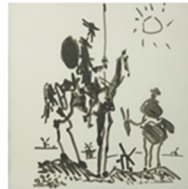

D

**Graphical Abstract** A: “braided” fresh mozzarella from buffalo cheese. Produced mainly in central-southern Italy, is possibly appreciated all over the world. B: Parmesan cheese shape and wedge. The most select parmesan cheese may have undergone up to 36 months of aging in controlled atmosphere. The standard weight of a matured parmesan shape is about 40 kg, for which about 550 liters of cow milk are required. C The Booted Cat (Le Chat Botté) the main character of the fable by the French novelist Charles Perrault (Paris, 1628-1703). D: Sketch by Pablo Picasso depicting the Knight Don Quixote and the faithful squire Sancho possibly mumbling over the opportunity to storm the windmill.
